# Supplementary material
Source: MDPI journal article supplement (https://www.mdpi.com/2073-4352/12/12/1692)
Supplement: s1 [file s1]

## Supplementary Material

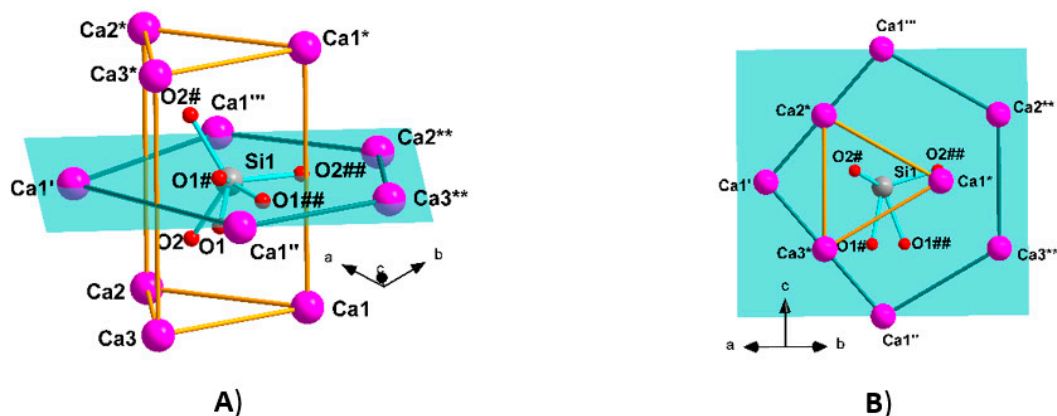

**Figure S1.** Presentation of the trigonal prism and the atoms at the equator plane for the  $\alpha$ -C<sub>2</sub>S trigonal polymorph: **A)** depicts the top and **B)** the bottom view. Symmetry codes: ('):  $1+x, y, z$ ; (''):  $1+x-y, 1-z, -z$ ; (''''):  $1+x-y, 1-y, 1-z$ ; (\*):  $1+x, 1+y, 1-z$ ; (\*\*):  $x, 1+y, z$ ; (#):  $1-y, 1+x-y, z$ ; (###):  $-x+y, 1-y, z$ .

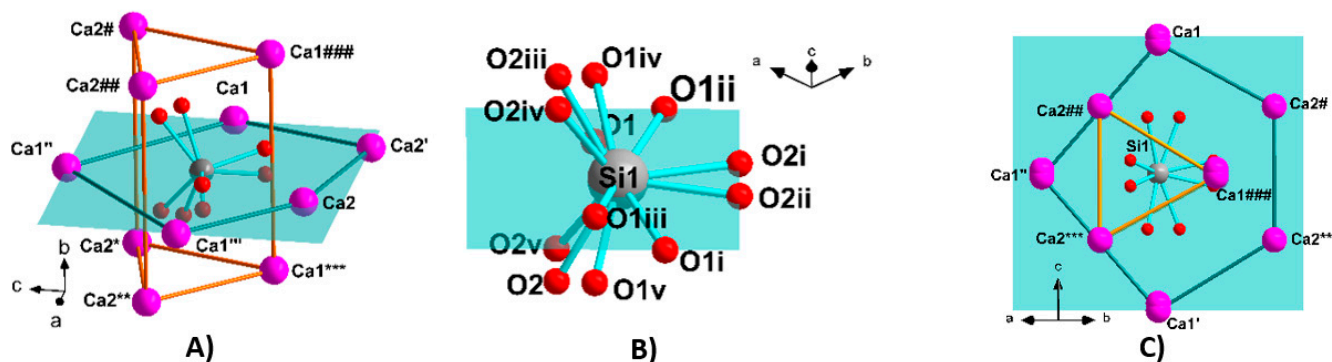

**Figure S2.** Presentation of the trigonal prism and the atoms at the equator plane for the  $\alpha$ -C<sub>2</sub>S hexagonal polymorph: **A)** depicts the top and **C)** the bottom view; **B)** presents the oxygen sites for the SiO<sub>4</sub><sup>4-</sup> anion. Symmetry codes: ('):  $x, y-1+z$ ; (''):  $1+x-y, x, -0.5+z$ ; (''''):  $x-y, x, 0.5+z$ ; (\*):  $x-y, x, 0.5+z$ ; (\*\*):  $x, 1+y, z$ ; (\*\*'):  $1+x, 1+y, z$ ; (#):  $x-y, 1+y, 0.5+z$ ; (##):  $1+x-y, 1+y, 0.5+y$ ; (###):  $1+x-y, 1+x, -0.5+z$ .

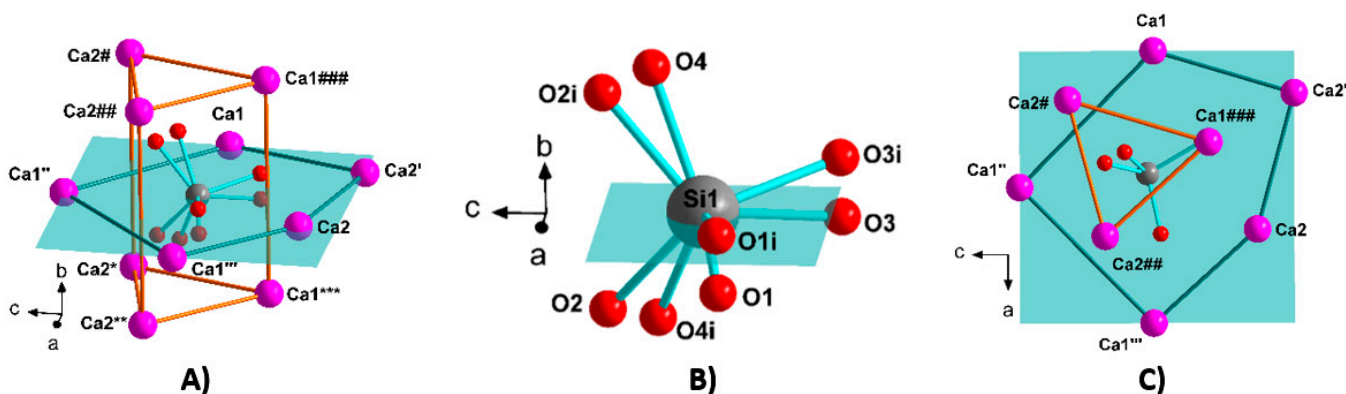

**Figure S3.** Presentation of the trigonal prism and the atoms at the equator plane for the  $\alpha'$ -C<sub>2</sub>S polymorph: **A)** depicts the top and **C)** the bottom view; **B)** presents the oxygen sites for the SiO<sub>4</sub><sup>4-</sup> anion. Symmetry codes: ('): -0.5+x, 0.5-y, 0.5-z; (''): 0.5+x, 0.5-y, 1.5-z; (''''): 1+x, y, z; (\*): 1.5-x, 0.5+y, 0.5+z; (\*\*): 2-x, -0.5+y, 1-z; (\*\*'): 1-x, -0.5+y, 1-z; (#): 1.5-x, 1.5-y, 0.5-z; (##): 2-x, 0.5-y, 1-z; (###): 1-x, 1-y, 1-z

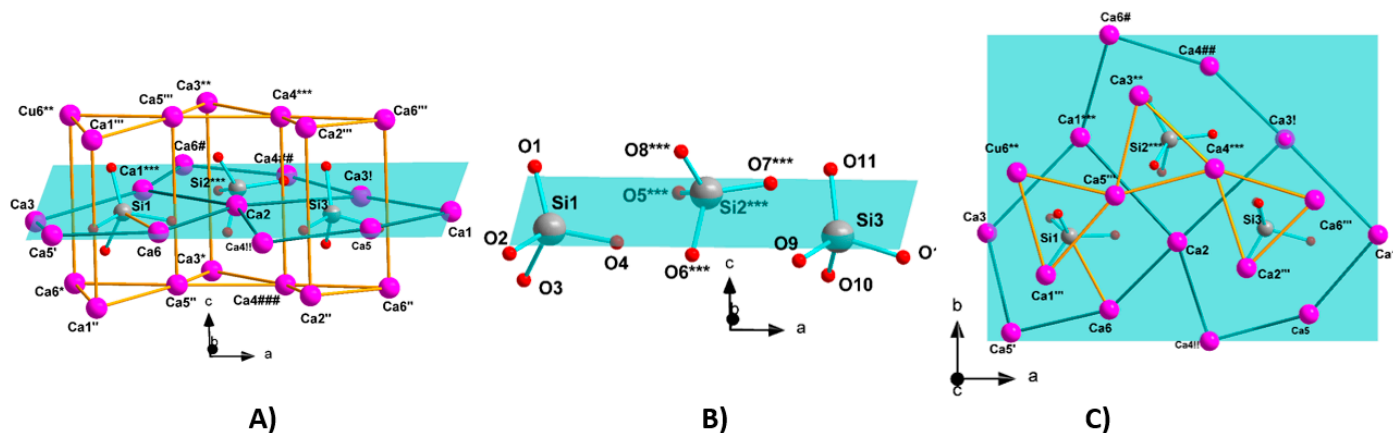

**Figure S4.** Presentation of the trigonal prism and the atoms at the equator plane for the  $\alpha'$ -C<sub>2</sub>S polymorph: **A)** depicts the top and **C)** the bottom view; **B)** presents the oxygen sites for the SiO<sub>4</sub><sup>4-</sup> anion. Symmetry codes: ('): -0.5+x, 0.5-y, 0.5-z; (''): 0.5+x, 0.5-y, 1.5-z; (''''): 1+x, y, z; (\*): 1.5-x, -0.5+y, 0.5+z; (\*\*): 2-x, -0.5+y, 1-z; (\*\*'): 1-x, -0.5+y, 1-z; (#): 1.5-x, 1.5-y, 0.5-z; (##): 2-x, 0.5+y, 1-z; (###): 1-x, 1-y, 1-z.

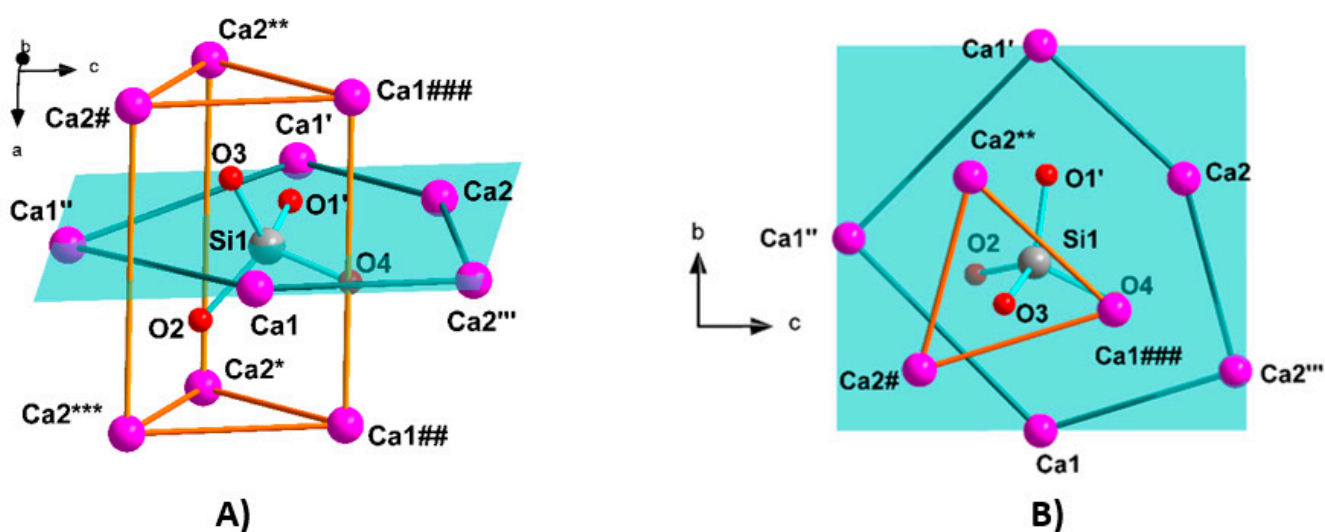

**Figure S5.** Presentation of the trigonal prism and the atoms at the equator plane for the  $\beta$ -C<sub>2</sub>S trigonal polymorph: **A)** depicts the top and **B)** the bottom view. Symmetry codes: ('): x, 1+y, z; (''): 0.5-x, 0.5+y, 0.5-z; (''''): 0.5-x, -0.5+y, 0.5-z; (\*): 1-x, 2-y, 1-z; (\*\*): -x, 2-y, 1-z; (\*\*'): 0.5+x, 1.5-y, -0.5+z; (#): -0.5+x, 1.5-y, -0.5+z; (##): 1-x, 1-y, 1-z; (###): -x, 1-y, 1-z.

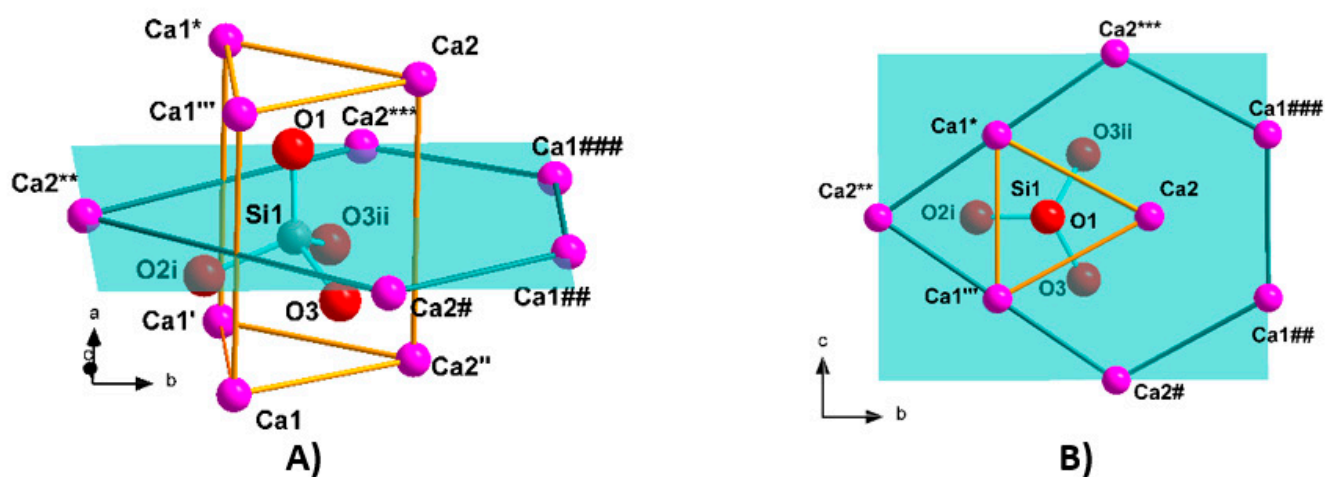

**Figure S6.** Presentation of the trigonal prism and the atoms at the equator plane for the  $\gamma$ -C<sub>2</sub>S polymorph: **A)** depicts the top and **B)** the bottom view. Symmetry codes: ('):  $-x, -y, 0.5+z$ ; (''):  $-1+x, y, z$ ; (''''):  $1+x, y, z$ ; (\*):  $1-x, -y, 0.5+z$ ; (\*\*):  $1.5-x, -0.5+y, 0.5-z$ ; (\*\*\*):  $-0.5+x, 0.5-y, 1-z$ ; (#):  $-0.5+x, 0.5-y, -z$ ; (##):  $0.5+x, 0.5-y, -z$ ; (###):  $0.5-x, 0.5-y, 0.5-z$ .

| <b>Table-S1. Geometric parameters of trigonal prisms</b> |                      |                       |                 |                 |                       |       |              |               |
|----------------------------------------------------------|----------------------|-----------------------|-----------------|-----------------|-----------------------|-------|--------------|---------------|
| Parameter                                                | $\alpha$ -C2S<br>Tri | $\alpha$ -C2S-<br>Hex | $\alpha'$ H-C2S | $\alpha'$ L-C2S |                       |       | $\beta$ -C2S | $\gamma$ -C2S |
|                                                          |                      |                       |                 | (Si1)           | Si(2 <sup>***</sup> ) | (Si3) |              |               |
| Si-A1                                                    | 3.752                | 3.682                 | 3.915           | 3.262           | 3.839                 | 2.814 | 3.830        | 2.968         |
| Si-A2                                                    | 3.616                | 3.682                 | 3.386           | 4.047           | 3.600                 | 3.910 | 3.461        | 2.968         |
| Si-A3                                                    | 3.198                | 3.195                 | 3.299           | 3.475           | 3.508                 | 3.335 | 3.126        | 3.034         |
| <Si-A1,2,3>                                              | 3.522                | 3.429                 | 3.533           | 3.595           | 3.649                 | 3.353 | 3.472        | 2.990         |
| Si-A4                                                    | 3.616                | 3.682                 | 3.386           | 3.140           | 3.915                 | 3.542 | 3.973        | 3.535         |
| Si-A5                                                    | 3.752                | 3.682                 | 3.915           | 3.940           | 3.104                 | 3.877 | 3.205        | 3.353         |
| Si-A6                                                    | 3.198                | 3.195                 | 3.299           | 3.530           | 3.201                 | 3.502 | 3.277        | 3.513         |
| <Si-A4,5,6>                                              | 3.522                | 3.429                 | 3.533           | 3.537           | 3.407                 | 3.640 | 3.485        | 3.467         |
|                                                          |                      |                       |                 |                 |                       |       |              |               |
| Si-B1                                                    | 3.198                | 3.195                 | 3.245           | 3.433           | 3.558                 | 3.16  | 3.287        | 3.581         |
| Si-B2                                                    | 3.782                | 3.570                 | 3.099           | 3.728           | 3.074                 | 3.889 | 3.812        | 3.658         |
| Si-B3                                                    | 3.751                | 3.682                 | 4.226           | 2.891           | 4.167                 | 3.331 | 3.042        | 4.834         |
| Si-B4                                                    | 3.616                | 3.682                 | 3.198           | 3.898           | 2.892                 | 4.34  | 4.009        | 4.834         |
| Si-B5                                                    | 3.544                | 3.756                 | 3.778           | 2.856           | 3.999                 | 3.099 | 2.965        | 3.658         |
|                                                          |                      |                       |                 |                 |                       |       |              |               |
| Si-A1,2,3                                                | 2.766                | 2.766                 | 2.824           | 2.801           | 2.824                 | 2.985 | 2.537        | 2.196         |
| Si-A4,5,6                                                | 2.766                | 2.766                 | 2.762           | 2.801           | 2.762                 | 2.576 | 3.006        | 2.884         |
|                                                          |                      |                       |                 |                 |                       |       |              |               |
| equat.- A1,2,3                                           | 2.766                | 2.766                 | 2.801           | 2.737           | 2.960                 | 2.738 | 2.783        | 2.548         |
| equat.- A4,5,6                                           | 2.766                | 2.766                 | 2.801           | 2.846           | 2.615                 | 2.850 | 2.705        | 2.534         |
|                                                          |                      |                       |                 |                 |                       |       |              |               |
| h/<l>                                                    | 1.507                | 1.507                 | 1.555           | 1.554           | 1.561                 | 1.585 | 1.572        | 1.444         |

Footnote: Si-A1, Si-A2, Si-A3, Si-A4, Si-A5, Si-A6, Si-B1, Si-B2, Si-B3, Si-B4 and Si-B5 are distances to the corresponding calcium cation; <Si-A1,2,3> and <Si-A4,5,6> are the average distances of Si atoms from the corresponding calcium cations belonging to the bottom and top base, respectively. Si-A1,2,3; Si-A4,5,6; equat.- A1,2,3 and equat.- A4,5,6 are distances of Si cations and B1, ..., B5 equator plane from the plane defined by the calcium atoms at the bottom (A1,2,3) and top (A4,5,6) bases of the trigonal prism; h is the height of the prism and <l> is the average length of the triangular bases. All lengths in the table are in Å. The coding of distances refers to Figure 7 of the main text.

**Table S2.** Crystallographic parameters for all studied structures.

**Parameters for 8B2 prototype structure.**

|                        |                           |               |            |            |            |
|------------------------|---------------------------|---------------|------------|------------|------------|
| <b>Formula Unit</b>    | <b>InNi<sub>2</sub></b>   |               |            |            |            |
| <b>ICDD #</b>          | 640098                    |               |            |            |            |
| <b>Crystal system</b>  | hexagonal                 |               |            |            |            |
| <b>Space Group</b>     | <i>P6<sub>3</sub>/mmc</i> |               |            |            |            |
| <b>Cell parameters</b> | a=4.265 Å and c=5.163 Å   |               |            |            |            |
| <b>Cell volume/Z</b>   | 81.33 Å <sup>3</sup> /2   |               |            |            |            |
| <b>Atom</b>            | <b>Wyck.</b>              | <b>S.O.F.</b> | <b>x/a</b> | <b>y/b</b> | <b>z/c</b> |
| In1                    | 2c                        | 1             | 1/3        | 2/3        | 1/4        |
| Ni1                    | 2a                        | 1             | 0          | 0          | 0          |
| Ni2                    | 2d                        | 1             | 1/3        | 2/3        | 0.75       |
| Reference              | [31]                      |               |            |            |            |

**Parameters for C23 prototype structure.**

|                        |                                      |               |            |            |            |
|------------------------|--------------------------------------|---------------|------------|------------|------------|
| <b>Formula Unit</b>    | <b>CaSi<sub>2</sub></b>              |               |            |            |            |
| <b>ICDD #</b>          | 158275                               |               |            |            |            |
| <b>Crystal system</b>  | Orthorhombic                         |               |            |            |            |
| <b>Space Group</b>     | <i>Pnma</i>                          |               |            |            |            |
| <b>Cell parameters</b> | a=7.691 Å, b=4.8174 Å and c=9.0477 Å |               |            |            |            |
|                        | 335.2 Å <sup>3</sup> /4              |               |            |            |            |
| <b>Atom</b>            | <b>Wyck.</b>                         | <b>S.O.F.</b> | <b>x/a</b> | <b>y/b</b> | <b>z/c</b> |
| Ca1                    | 4c                                   | 1             | 0.5207     | 0.2500     | 0.6759     |
| Ca2                    | 4c                                   | 1             | 0.6545     | 0.2500     | 0.0730     |
| Si1                    | 4c                                   | 1             | 0.2552     | 0.2500     | 0.1072     |
| Reference              | [32]                                 |               |            |            |            |

# Parameters for $\alpha_{\text{Tr}}\text{-C}_2\text{S}$

| Formula Unit    | $\text{Ca}_2\text{SiO}_4$ (tr)                  |        |        |        |        |
|-----------------|-------------------------------------------------|--------|--------|--------|--------|
| ICDD #          | 82999                                           |        |        |        |        |
| Crystal system  | Trigonal                                        |        |        |        |        |
| Space Group     | $P\bar{3}m1$                                    |        |        |        |        |
| Cell parameters | $a=5.532 \text{ \AA}$ and $c=7.327 \text{ \AA}$ |        |        |        |        |
| Cell volume/Z   | $V = 194.2 \text{ \AA}^3/Z=2$                   |        |        |        |        |
| Atom            | Wyck.                                           | S.O.F. | x/a    | y/b    | z/c    |
| Ca1             | 2d                                              | 1      | -1/3   | 1/3    | 0.2523 |
| Ca2             | 1b                                              | 1      | 0      | 0      | 1/2    |
| Ca3             | 1a                                              | 1      | 0      | 0      | 0      |
| Si1             | 2d                                              | 1      | 1/3    | 2/3    | 0.2314 |
| O1              | 6i                                              | 0.3333 | 0.2714 | 0.5430 | 0.0176 |
| O2              | 6i                                              | 1      | 0.1749 | 0.3498 | 0.2928 |
| Reference       | [4]                                             |        |        |        |        |

# Parameters for $\alpha_{\text{H}}\text{-C}_2\text{S}$

| Formula sum     | $\text{Ca}_2\text{SiO}_4$ ( $\alpha_{\text{H}}$ ) |        |        |        |        |
|-----------------|---------------------------------------------------|--------|--------|--------|--------|
| ICDD #          | 82998                                             |        |        |        |        |
| Crystal system  | Hexagonal                                         |        |        |        |        |
| Space Group     | $P6_3/mmc$                                        |        |        |        |        |
| Cell parameters | $a=5.532 \text{ \AA}$ and $c=7.327 \text{ \AA}$   |        |        |        |        |
| Cell volume/Z   | $V=194.2 \text{ \AA}^3/Z=2$                       |        |        |        |        |
| Atom            | Wyck.                                             | S.O.F. | x/a    | y/b    | z/c    |
| Ca1             | 4f                                                | 0.5    | 1/3    | 2/3    | 0.7373 |
| Ca2             | 2a                                                | 1      | 0      | 0      | 1      |
| Si1             | 2c                                                | 1      | 1/3    | 2/3    | 1/4    |
| O1              | 12k                                               | 0.333  | 0.2721 | 0.5442 | 0.4595 |
| O2              | 12k                                               | 0.333  | 0.1741 | 0.3482 | 0.2018 |
| Reference       | [4]                                               |        |        |        |        |

# Parameters for $\alpha'_H\text{-C}_2\text{S}$

| Formula Unit    | $\text{Ca}_2\text{SiO}_4$ ( $\alpha'_H$ )                               |        |        |        |        |
|-----------------|-------------------------------------------------------------------------|--------|--------|--------|--------|
| ICDD #          | 82997                                                                   |        |        |        |        |
| Crystal system  | Orthorhombic                                                            |        |        |        |        |
| Space Group     | $Pnma$                                                                  |        |        |        |        |
| Cell parameters | $a=6.871 \text{ \AA}$ , $b=5.601 \text{ \AA}$ and $c=9.556 \text{ \AA}$ |        |        |        |        |
| Cell volume/Z   | $V = 367.8 \text{ \AA}^3/Z=4$                                           |        |        |        |        |
| Atom            | Wyck.                                                                   | S.O.F. | x/a    | y/b    | z/c    |
| Ca1             | 8d                                                                      | 0.5    | 0.3326 | 1/4    | 0.5732 |
| Ca2             | 8d                                                                      | 0.5    | 0.9879 | 1/4    | 0.2989 |
| Si1             | 4c                                                                      | 1      | 0.7831 | 1/4    | 0.5891 |
| O1              | 8d                                                                      | 0.5    | 1.0050 | 0.1919 | 0.5545 |
| O2              | 8d                                                                      | 0.5    | 0.7436 | 0.0308 | 0.7016 |
| O3              | 8d                                                                      | 0.5    | 0.6658 | 0.1901 | 0.4449 |
| O4              | 8d                                                                      | 0.5    | 0.7041 | 0.5030 | 0.6495 |
| Reference       | [4]                                                                     |        |        |        |        |

# Parameters for $\alpha'_L\text{-C}_2\text{S}$

| Formula Unit    | $\text{Ca}_2\text{SiO}_4$ ( $\alpha'_L$ )                                |        |        |        |        |
|-----------------|--------------------------------------------------------------------------|--------|--------|--------|--------|
| ICDD #          | 82996                                                                    |        |        |        |        |
| Crystal system  | Orthorhombic                                                             |        |        |        |        |
| Space Group     | $Pna2_1$                                                                 |        |        |        |        |
| Cell parameters | $a=20.527 \text{ \AA}$ , $b=9.496 \text{ \AA}$ and $c=5.590 \text{ \AA}$ |        |        |        |        |
| Cell volume/Z   | $V = 1089.6 \text{ \AA}^3/Z=12$                                          |        |        |        |        |
| Atom            | Wyck.                                                                    | S.O.F. | x/a    | y/b    | z/c    |
| Ca1             | 4a                                                                       | 1      | 0.7787 | 0.0726 | 0.7465 |
| Ca2             | 4a                                                                       | 1      | 0.4417 | 0.0469 | 0.8011 |
| Ca3             | 4a                                                                       | 1      | 0.1225 | 0.0794 | 0.7025 |
| Ca4             | 4a                                                                       | 1      | 0.9958 | 0.8137 | 0.7228 |
| Ca5             | 4a                                                                       | 1      | 0.6627 | 0.7836 | 0.7652 |
| Ca6             | 4a                                                                       | 1      | 0.3275 | 0.8001 | 0.7453 |
| Si1             | 4a                                                                       | 1      | 0.2607 | 0.0680 | 0.7590 |

|           |     |   |        |        |        |
|-----------|-----|---|--------|--------|--------|
| Si2       | 4a  | 1 | 0.9284 | 0.0805 | 0.7557 |
| Si3       | 4a  | 1 | 0.5896 | 0.0959 | 0.727  |
| O1        | 4a  | 1 | 0.7585 | 0.8504 | 0.4906 |
| O2        | 4a  | 1 | 0.7716 | 0.8674 | 0.053  |
| O3        | 4a  | 1 | 0.7811 | 0.0640 | 0.2141 |
| O4        | 4a  | 1 | 0.6628 | 0.9287 | 0.2032 |
| O5        | 4a  | 1 | 0.6080 | 0.4332 | 0.1838 |
| O6        | 4a  | 1 | 0.5845 | 0.6998 | 0.0427 |
| O7        | 4a  | 1 | 0.4988 | 0.5610 | 0.2906 |
| O8        | 4a  | 1 | 0.5969 | 0.6734 | 0.4786 |
| O9        | 4a  | 1 | 0.9500 | 0.4462 | 0.1919 |
| O10       | 4a  | 1 | 0.9252 | 0.6903 | 0.1270 |
| O11       | 4a  | 1 | 0.9213 | 0.6881 | 0.4724 |
| O12       | 4a  | 1 | 0.8344 | 0.5495 | 0.1618 |
| Reference | [4] |   |        |        |        |



### Parameters for $\beta$ -C<sub>2</sub>S

| Formula Unit    | Ca <sub>2</sub> SiO <sub>4</sub> ( $\beta$ )                                  |        |        |        |        |
|-----------------|-------------------------------------------------------------------------------|--------|--------|--------|--------|
| ICDD #          | 81096                                                                         |        |        |        |        |
| Crystal system  | Monoclinic                                                                    |        |        |        |        |
| Space Group     | <i>P21/n</i>                                                                  |        |        |        |        |
| Cell parameters | <i>a</i> =5.512 Å, <i>b</i> =6.758 Å, <i>c</i> =9.314 Å and $\beta$ = 94.581° |        |        |        |        |
| Cell volume/Z   | <i>V</i> = 345.8 Å <sup>3</sup> /Z=4                                          |        |        |        |        |
| Atom            | Wyck.                                                                         | S.O.F. | x/a    | y/b    | z/c    |
| Ca1             | 4e                                                                            | 1      | 0.2276 | 0.3435 | 0.4304 |
| Ca2             | 4e                                                                            | 1      | 0.2203 | 0.9979 | 0.7018 |
| Si1             | 4e                                                                            | 1      | 0.2680 | 0.7806 | 0.4193 |
| O1              | 4e                                                                            | 1      | 0.2195 | 0.0077 | 0.4424 |
| O2              | 4e                                                                            | 1      | 0.4753 | 0.7496 | 0.3083 |
| O3              | 4e                                                                            | 1      | 0.0158 | 0.6728 | 0.3619 |
| O4              | 4e                                                                            | 1      | 0.3431 | 0.6757 | 0.5718 |
| Reference       | [3]                                                                           |        |        |        |        |

### Parameters for $\gamma$ -C<sub>2</sub>S

| Formula Unit    | Ca <sub>2</sub> SiO <sub>4</sub> ( $\gamma$ )                |        |        |        |        |
|-----------------|--------------------------------------------------------------|--------|--------|--------|--------|
| ICDD #          | 82994                                                        |        |        |        |        |
| Crystal system  | Orthorhombic                                                 |        |        |        |        |
| Space Group     | <i>Pbnn</i>                                                  |        |        |        |        |
| Cell parameters | <i>a</i> = 5.076 Å, <i>b</i> =11.214 Å and <i>c</i> =6.758 Å |        |        |        |        |
| Cell volume/Z   | <i>V</i> = 384.7 Å <sup>3</sup> /Z=4                         |        |        |        |        |
| Atom            | Wyck.                                                        | S.O.F. | x/a    | y/b    | z/c    |
| Ca1             | 4a                                                           | 1      | 0      | 0      | 1      |
| Ca2             | 4c                                                           | 1      | 0.9924 | 0.2822 | 0.2500 |
| Si1             | 4c                                                           | 1      | 0.4293 | 0.0950 | 0.2500 |
| O1              | 4c                                                           | 1      | 0.7489 | 0.0932 | 0.2500 |
| O2              | 4c                                                           | 1      | 0.2996 | 0.9624 | 0.2500 |
| O3              | 8d                                                           | 1      | 0.2991 | 0.1623 | 0.0561 |
| Reference       | [4]                                                          |        |        |        |        |

**Table S3.** Transformation matrices of the unit cell axes which relate the cell axes of each belite polymorph with the hexagonal axes of the  $\alpha$ -C<sub>2</sub>S polymorph.

| $(a', b', c') = (a, b, c)P$                                                                                          | Transformation matrix $P$                                              |
|----------------------------------------------------------------------------------------------------------------------|------------------------------------------------------------------------|
| $a'_H\text{-C}_2\text{S}: (a_{\alpha'H}, b_{\alpha'H}, c_{\alpha'H}) = (a_{\alpha H}, b_{\alpha H}, c_{\alpha H}) P$ | $\begin{pmatrix} 0 & 1 & -1 \\ 0 & 1 & 1 \\ 1 & 0 & 0 \end{pmatrix}$   |
| $a'_L\text{-C}_2\text{S}: (a_{\alpha'L}, b_{\alpha'L}, c_{\alpha'L}) = (a_{\alpha H}, b_{\alpha H}, c_{\alpha H}) P$ | $\begin{pmatrix} 0 & -1 & -1 \\ 0 & 1 & -1 \\ 3 & 0 & 0 \end{pmatrix}$ |
| $a'_\gamma\text{-C}_2\text{S}: (a_\gamma, b_\gamma, c_\gamma) = (a_{\alpha H}, b_{\alpha H}, c_{\alpha H}) P$        | $\begin{pmatrix} -1 & 0 & -1 \\ -1 & 0 & 1 \\ 0 & 1 & 0 \end{pmatrix}$ |
| $a'_\beta\text{-C}_2\text{S}: (a_\beta, b_\beta, c_\beta) = (a_{\alpha H}, b_{\alpha H}, c_{\alpha H}) P$            | $\begin{pmatrix} 1 & -1 & 0 \\ 1 & 1 & 0 \\ 0 & 0 & 1 \end{pmatrix}$   |
